# Supplementary material
Source: publisher site journal article supplement (https://www.dovepress.com/get_supplementary_file.php?f=255299.docx)
Supplement: Supplementary file 1 [file get_supplementary_file.php]

**Supplementary materials**

Supplementary Figures


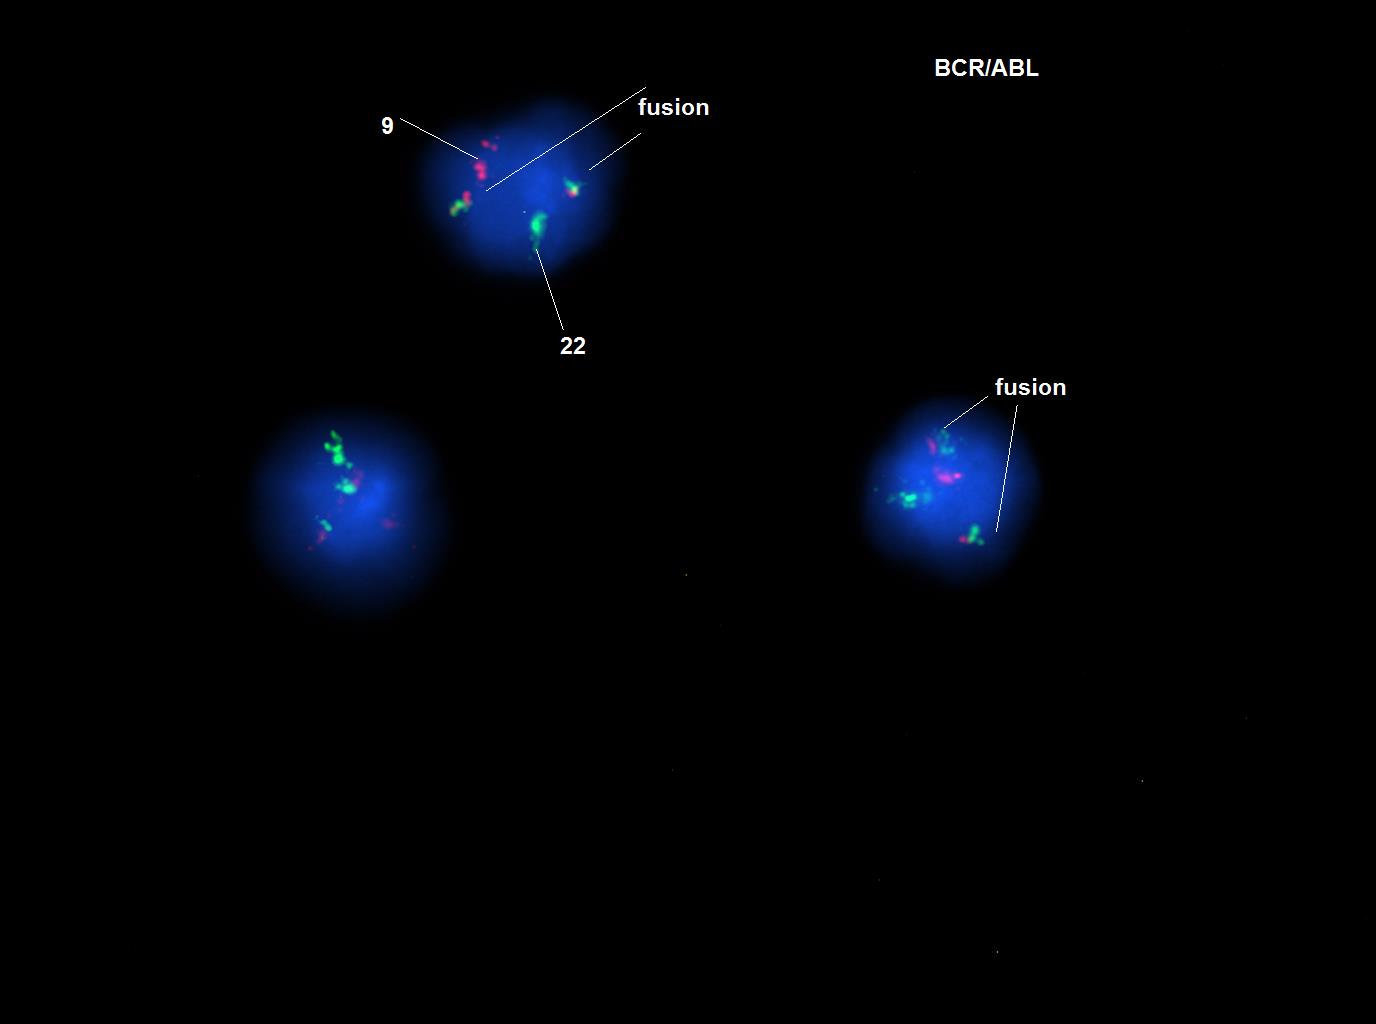


**Figure S1 FISH analysis of CD34+CD176+IL1RAP+population in CML-4. Fusion gene is shown by fusion of the colors.** Cells were tested before CFU assay.


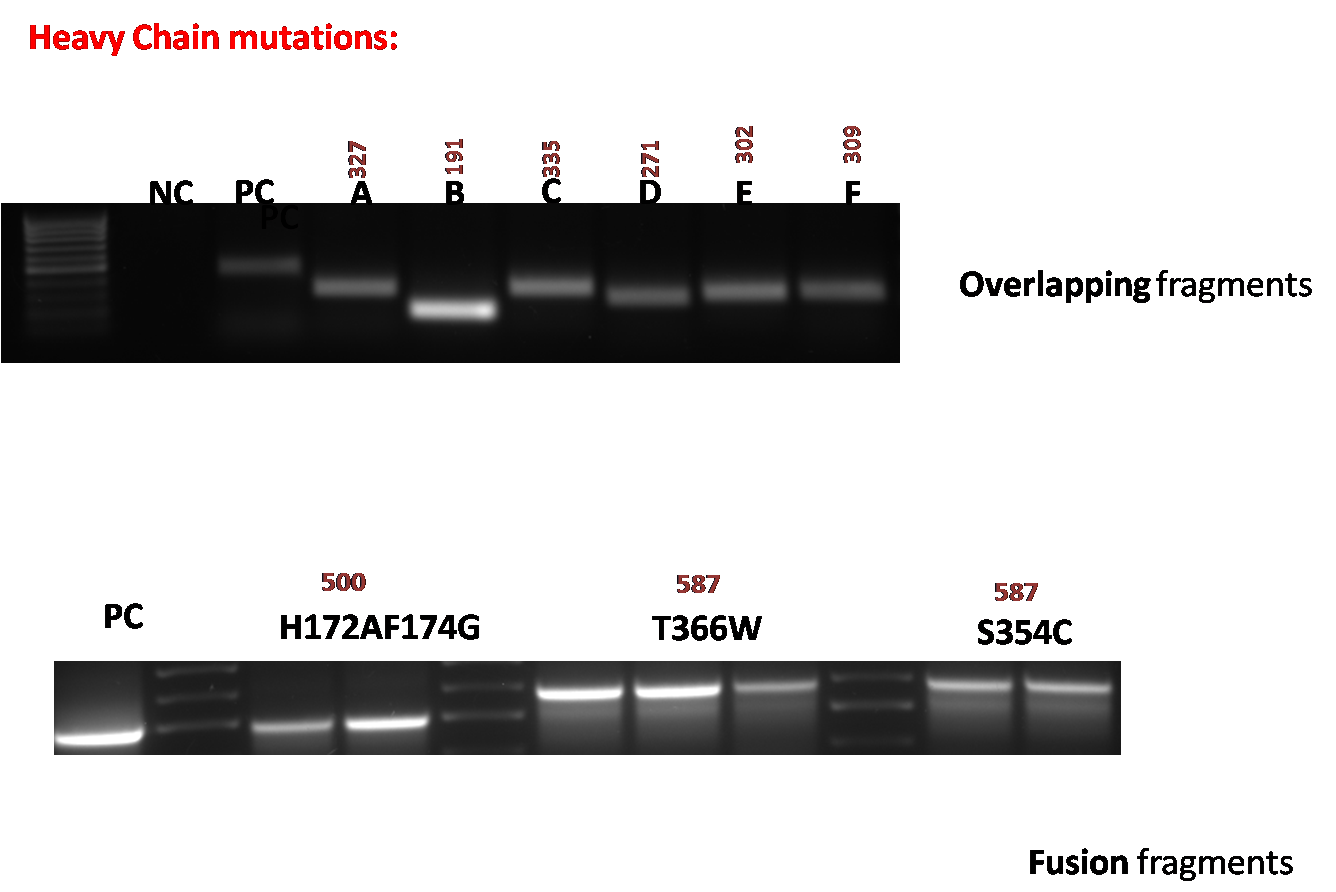

**Figure S2. Gel electrophoresis picture showing bands of PCR-amplified overlapping and fusion fragments for heavy chain mutations.** Refer to Supplementary table 3.


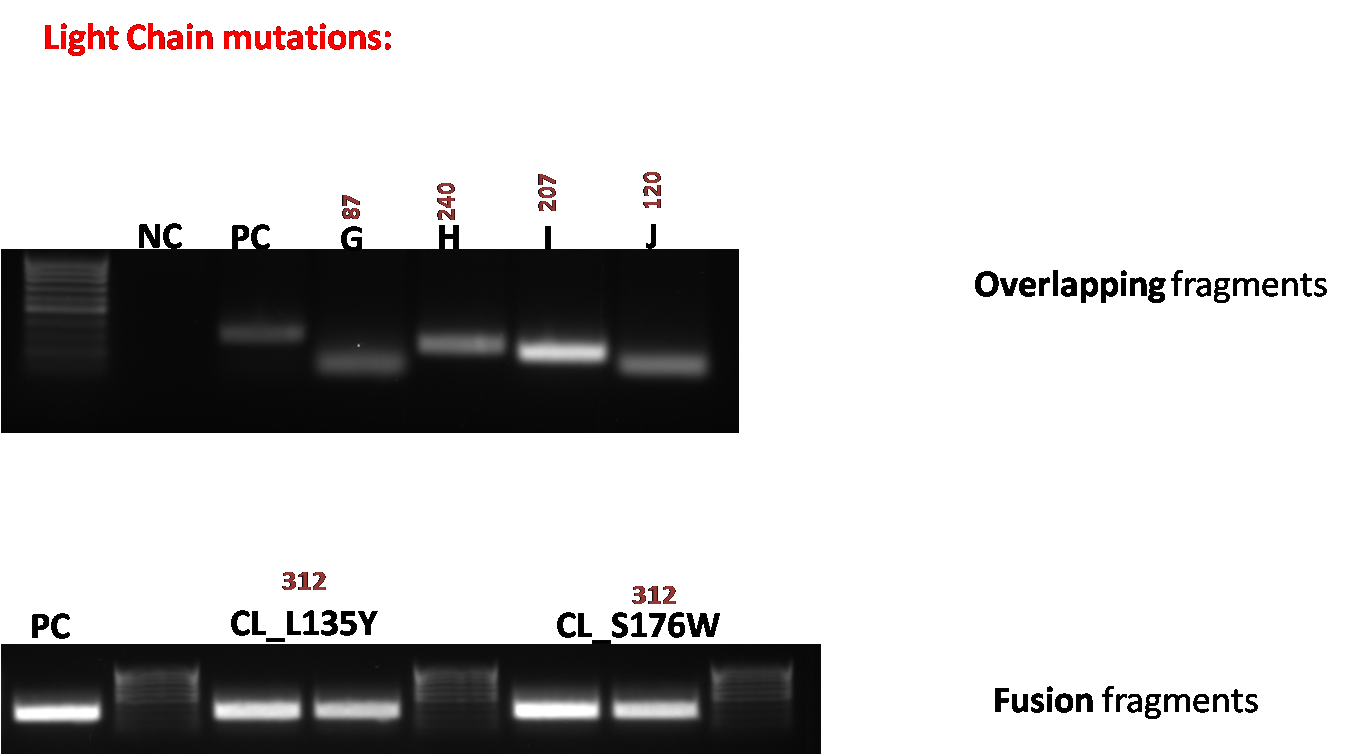


**Figure S3. Gel electrophoresis picture showing bands of PCR-amplified overlapping and fusion fragments for light chain mutations.** Refer to Supplementary table 3.


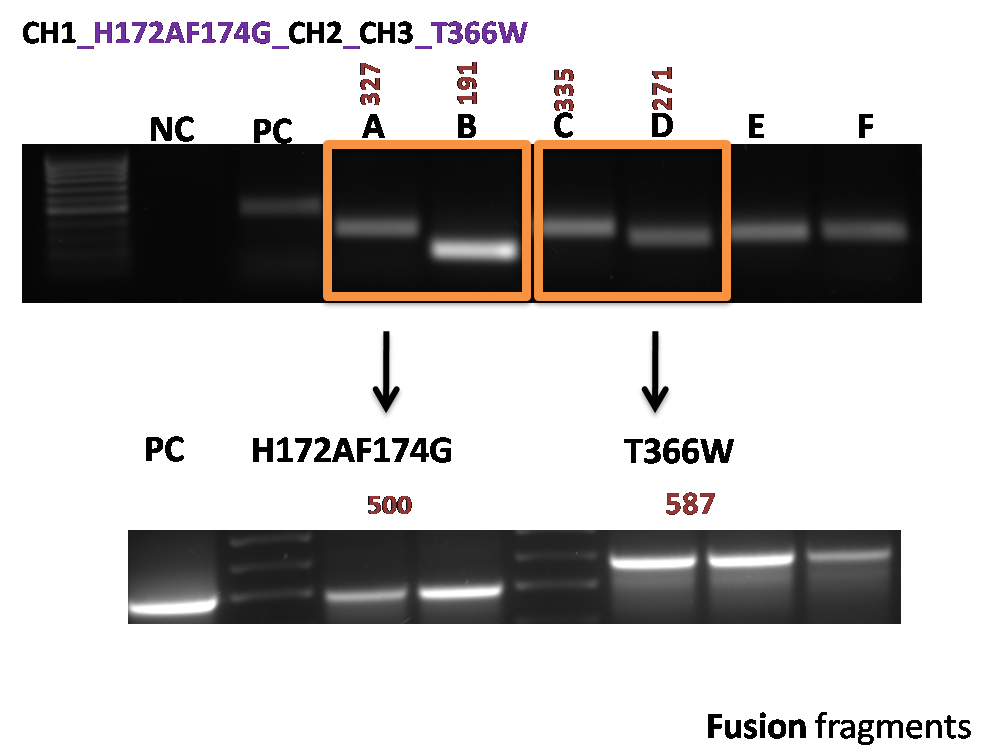


**Figure S4. Gel electrophoresis picture showing bands of CH1_H172AF174G _CH2_CH3_T366W mutation.** Refer to Supplementary table 3*.*


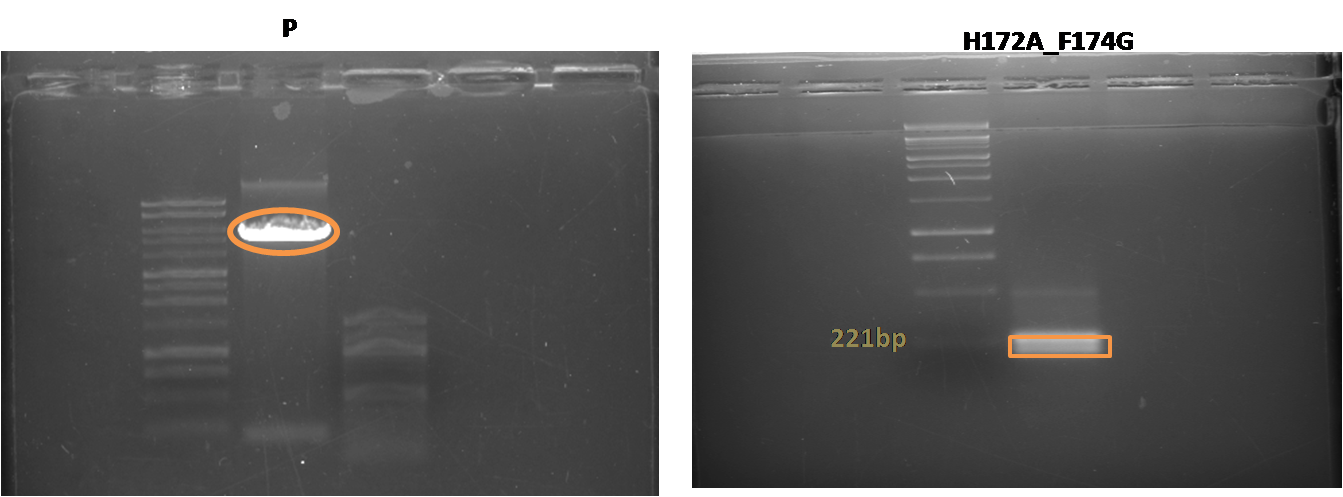

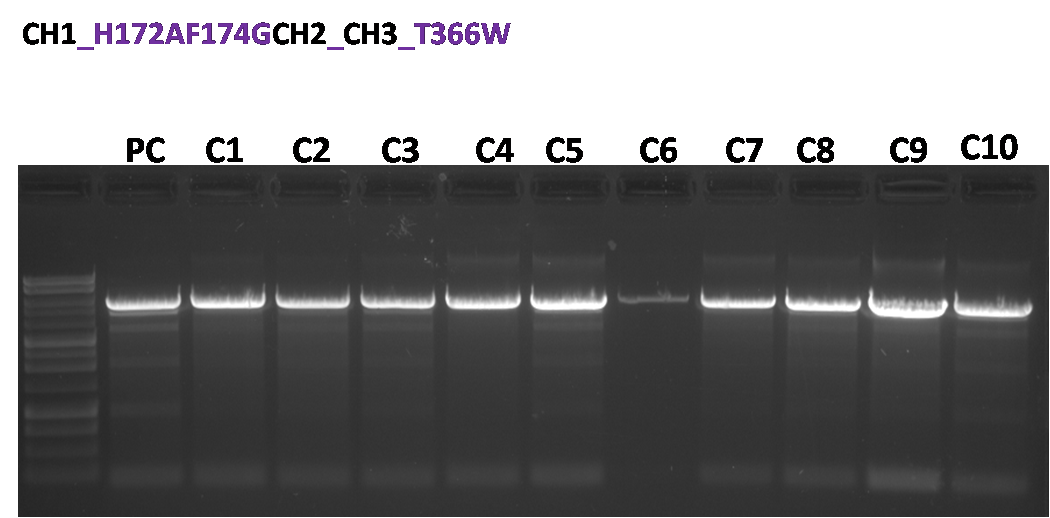


**Figure S5. Gel electrophoresis picture showing bands sub-cloning bands (up) and restriction mapping of the CH1_H172AF174G _CH2_CH3_T366W mutation(down).** Refer to Supplementary table 3.
P: plasmid; PC: positive control (wild type).


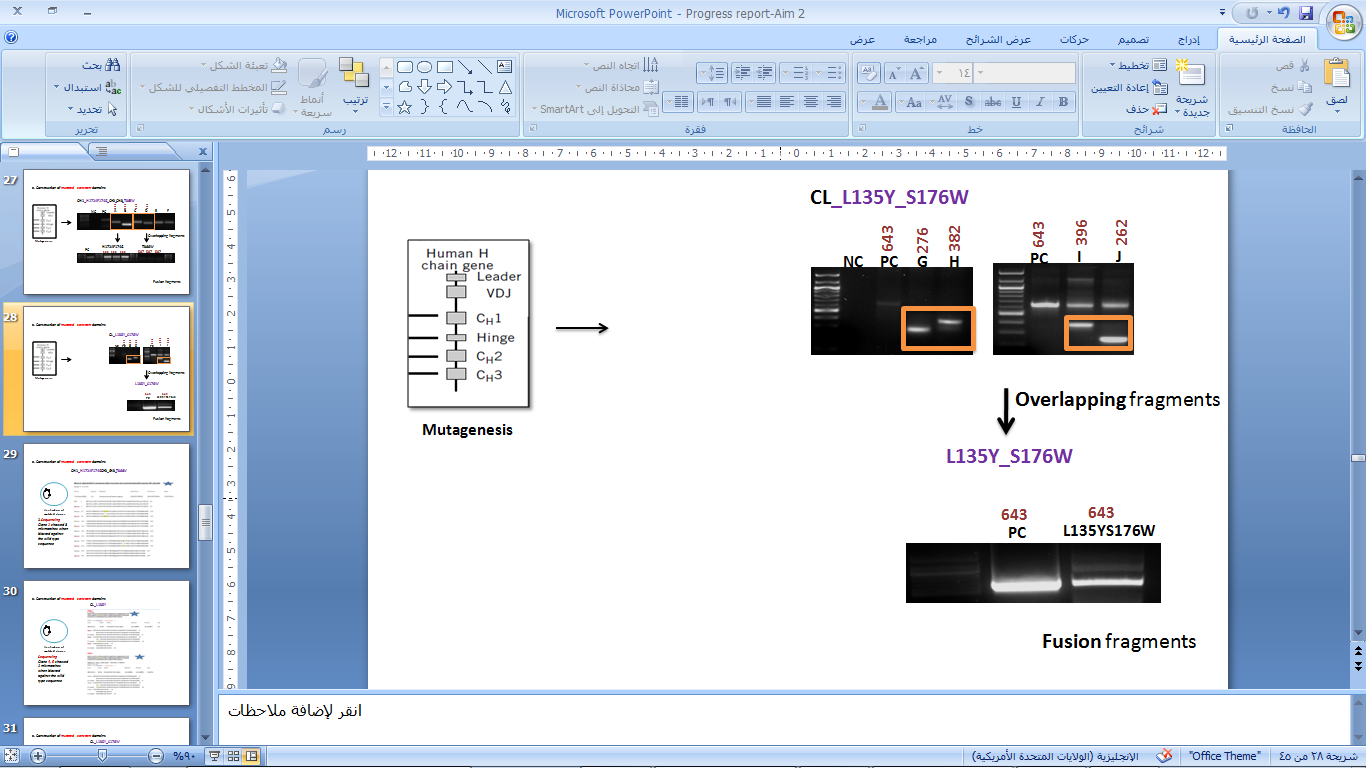


**Figure S6.** **Gel electrophoresis picture showing bands sub-cloning bands restriction mapping of the CL_L135Y_S176W mutation.** Refr to supplementary table 3. PC: positive control (wild type).


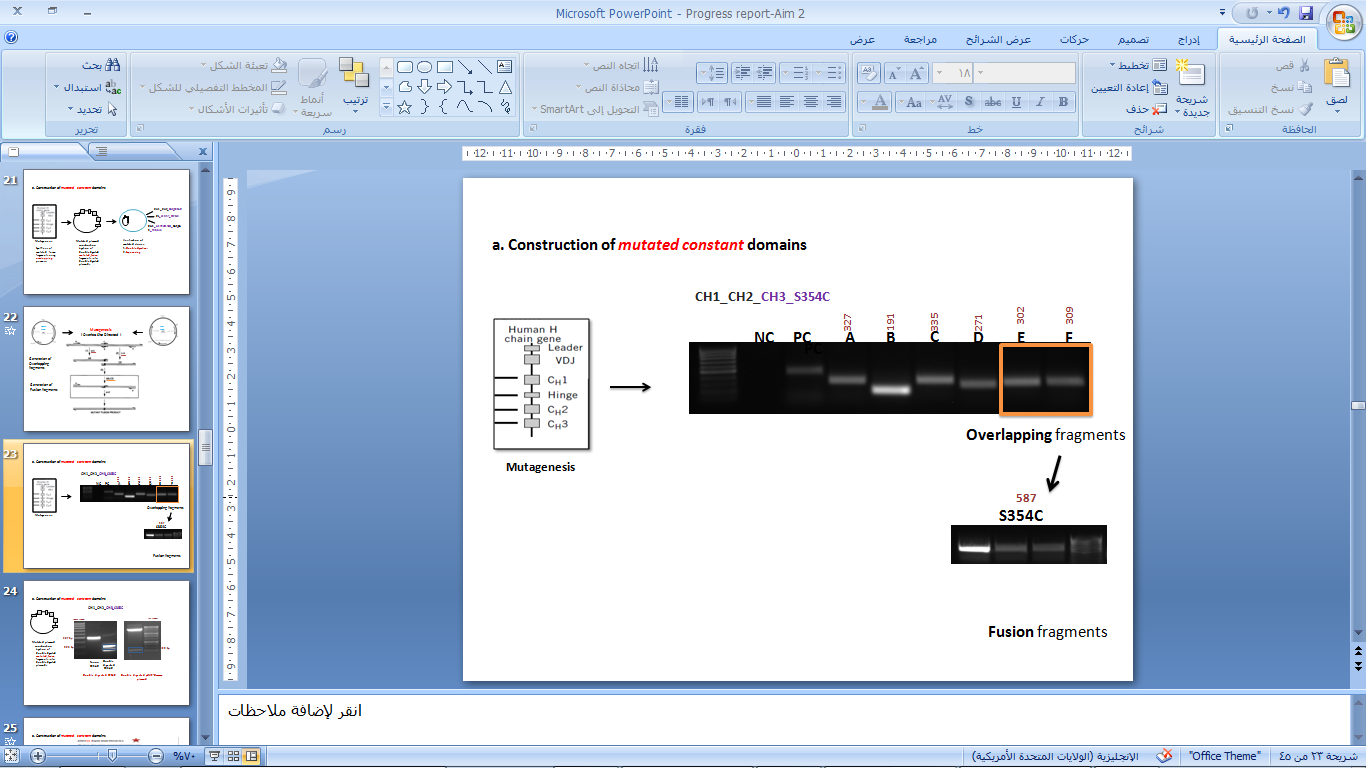


**Figure S7. Gel electrophoresis picture showing bands sub-cloning bands restriction mapping of the CH1__CH2_CH3_S354C mutation. Refer to Supplementary table 3.**

**
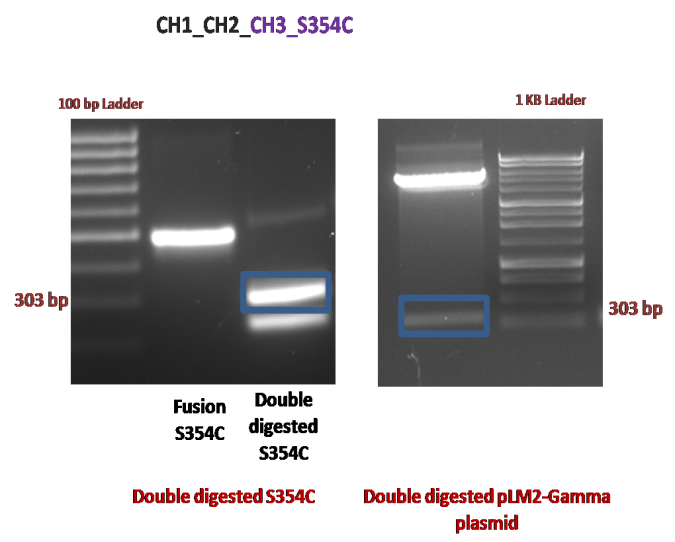
**

**
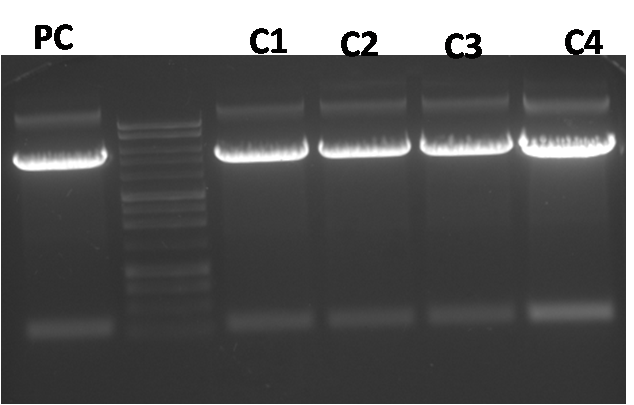
**

**Figure S8. Gel electrophoresis picture showing bands sub-cloning bands (up) and restriction mapping of the CH1__CH2_CH3_S354C(down). Refer to supplementary table 3.**

**
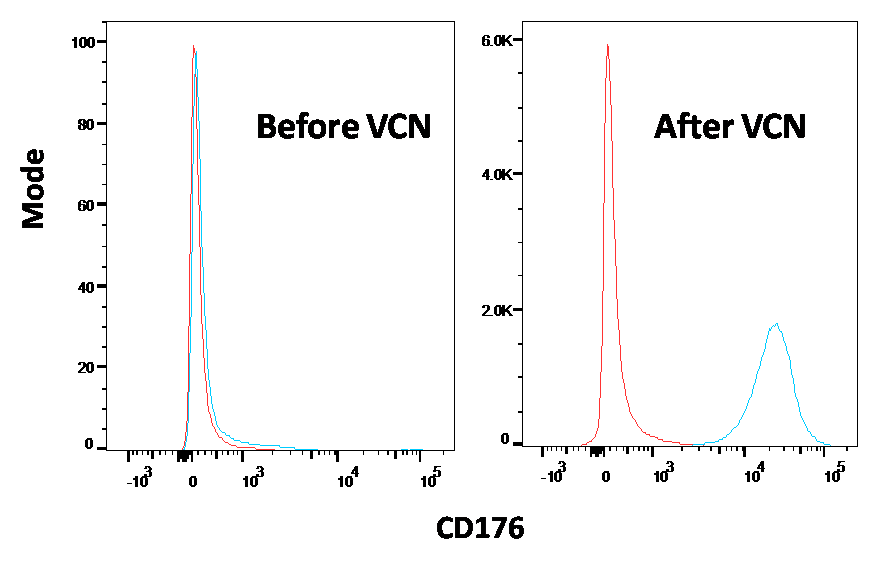
**

**Figure S9. Histogram illustrating the level of CD176 expression in KG1 cell line before and after VCN treatment**. VCN; Vibrio Cholera Neuroaminidase, an enzyme that exposes the CD176 antigen on the surface of cells for better expression. As shown in figure, anti-CD176 mAb binding was significantly increased after pretreatment with VCN.

**
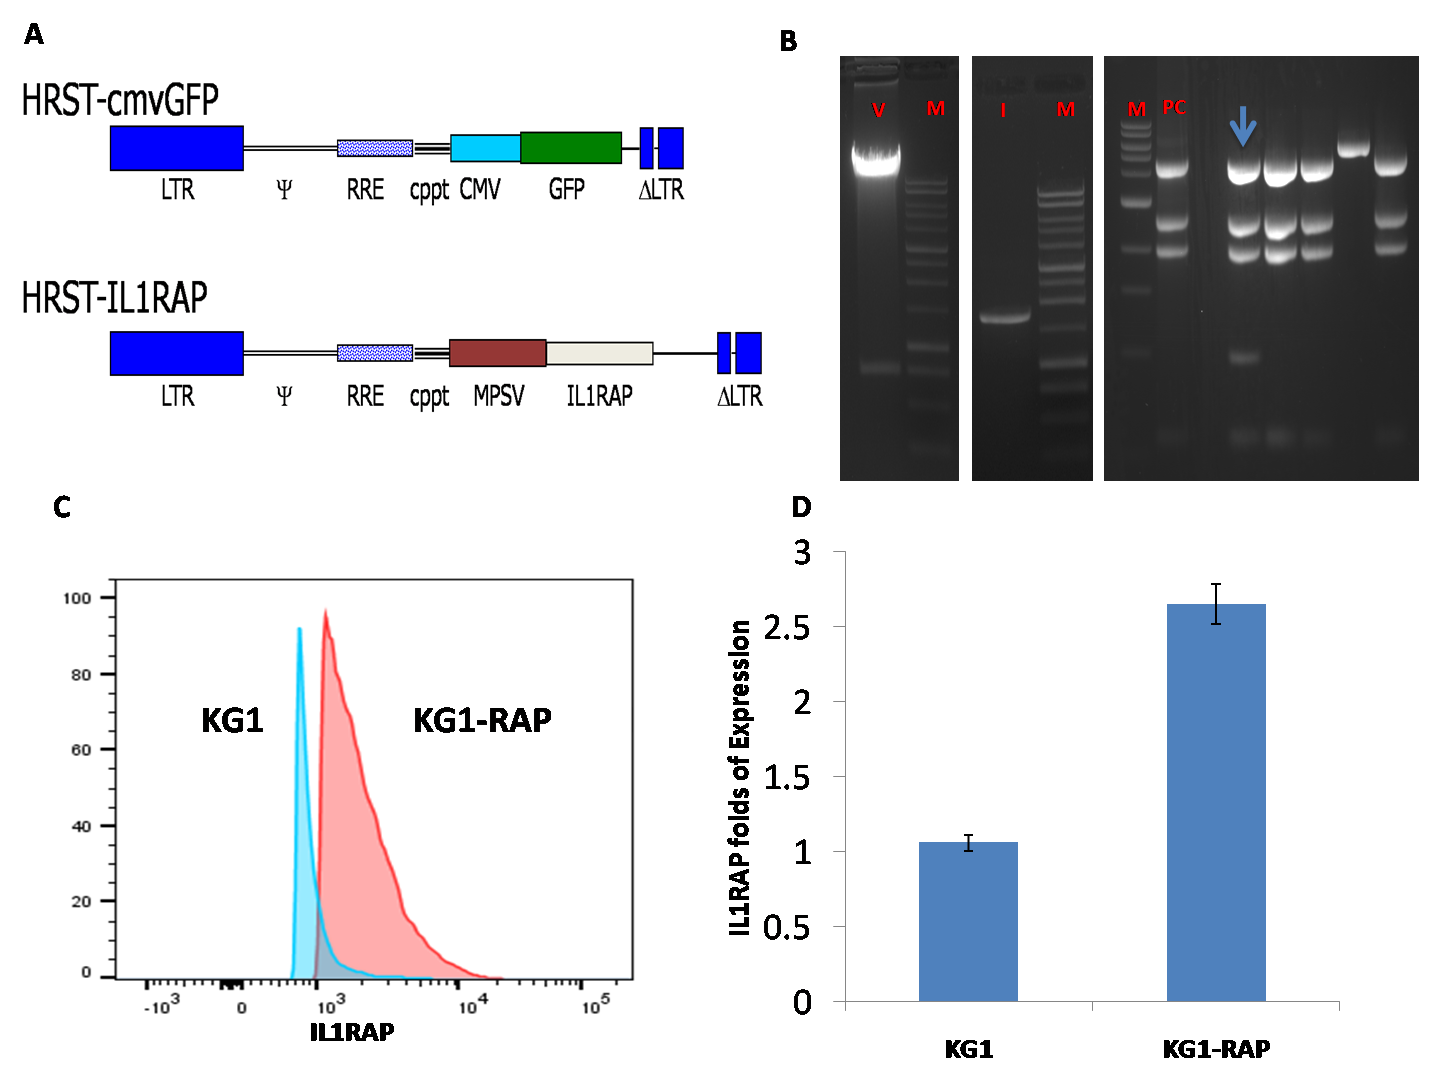
**

**Figure S10. IL1RAP is induced as a consequence of Lentiviral expression of KG1 cells (KG1/RAP; a cell line positive for both antigens).** A. pHRST-MPSV/CMV and pHRST-IL1RAP. B. Construction of pHRST-IL1RAP lentiviral vector and verification. The 700 bp GFP band was digested using BamHI/XhoI restriction enzymes. IL1RAP cDNA was PCR amplified with primers flanked with BamHI/XhoI sequences then ligated to the linearized pHRST-MPSV lentiviral backbone, transformed into E-coli and screened for colonies. Colonies were screened using HIND III , and an extra 1KB band (red box) was diagnostic for pHRST-MPSV-IL1RAP construct. V; Vector, M: DNA marker, I; insert, PC: positive control. C. Histogram showing IL1RAP expression in KG1/RAP versus KG1 cell line. D. IL1RAP expression was increased by more than 50% as a result of lentiviral transduction. Each point represents Mean ± SEM of the four samples.


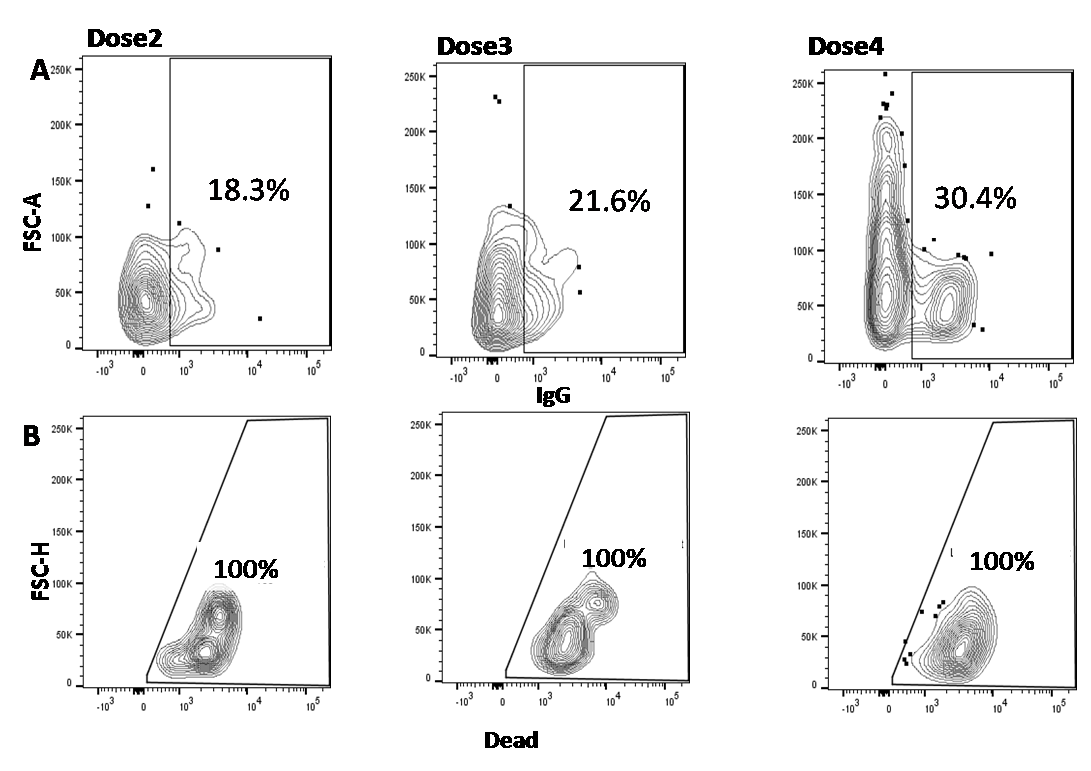


**Figure S11. Gating strategy used for analysis of the bi-specific antibody binding and killing (CML-3).** First, an IgG gate was drawn on the lymphocytes population in order to identify the binding capacity of the Bs-Ab. Then a second gate; LD stained, was drawn within the IgG+ population, in order to identify the frequency of dead cells within the bound cell population at different doses of TF1RAPa (A and B).


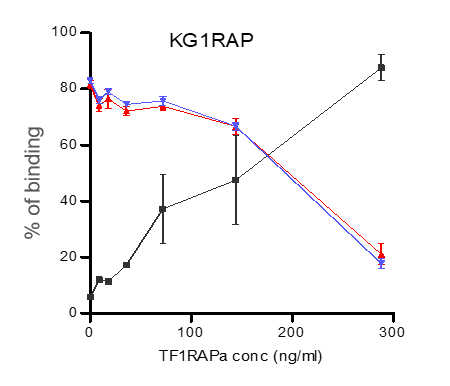


**Figure S12**. **Receptor occupancy of the bispecific antibody** (black line) versus the anti-IL1RAP and anti-CD176 mAbs (red and blue lines, respectively). These data demonstrate that increasing concentration of the Bis-Ab is specifically inhibiting the binding of both the IL1RAP and CD176 mAbs.


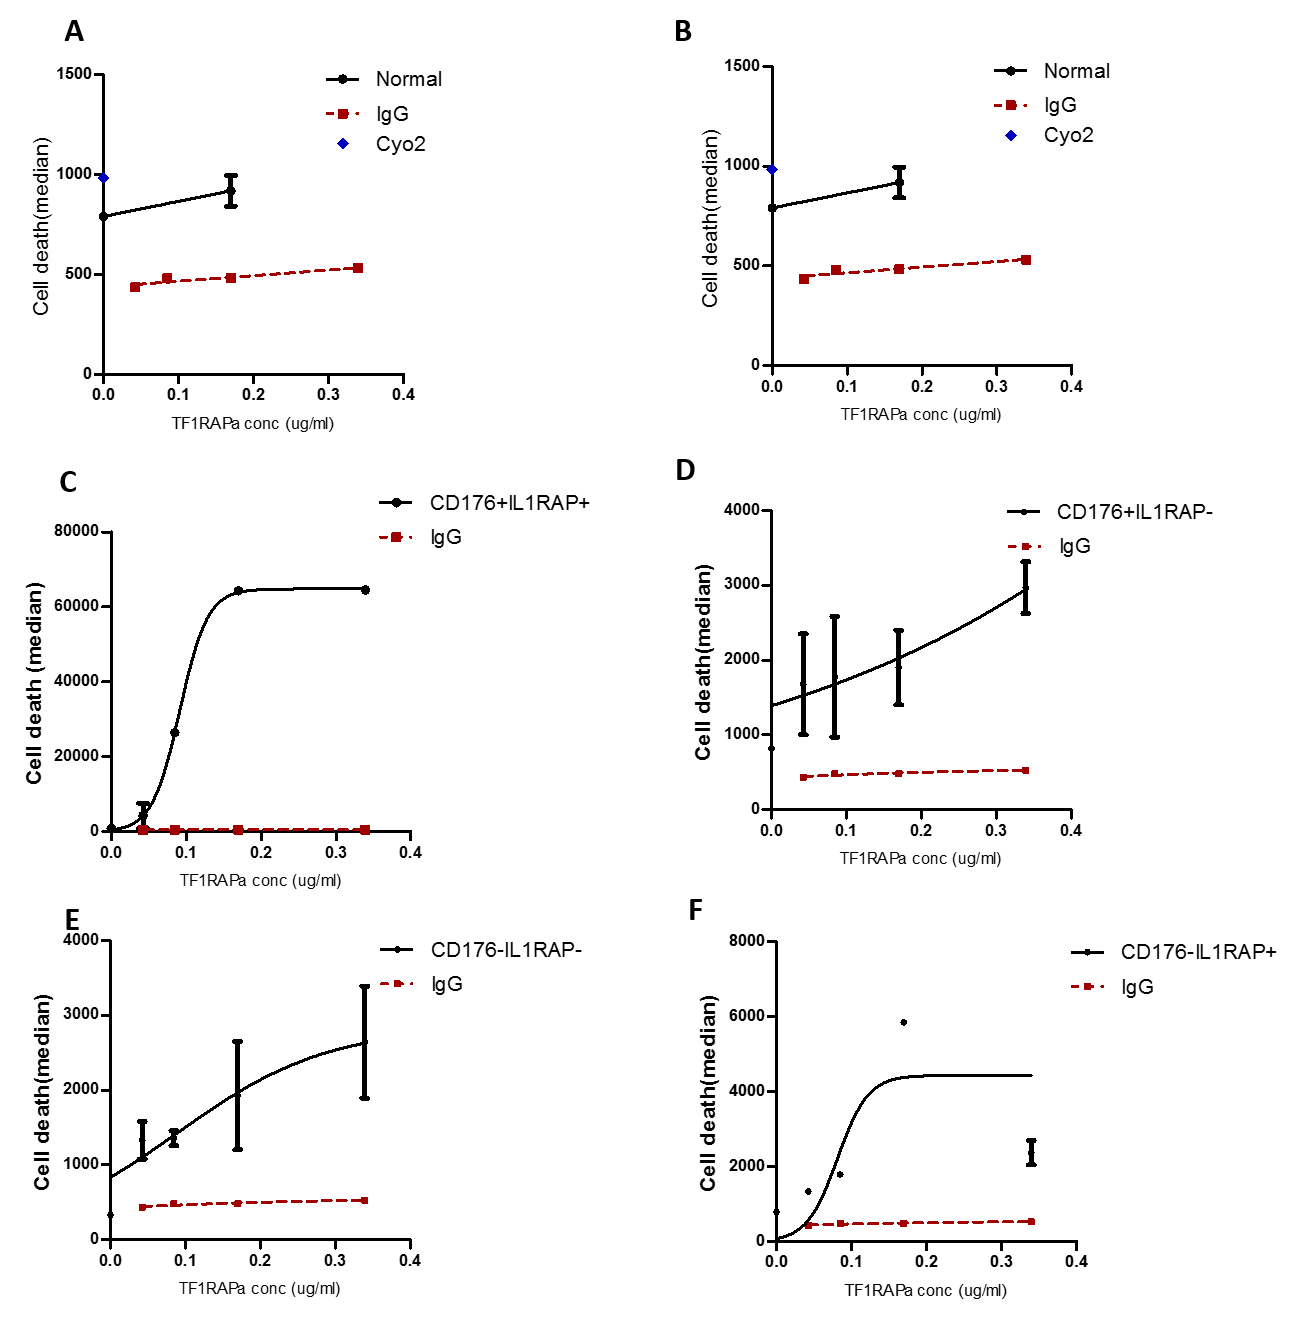


**Figure S13. Killing of CML PBMCs CD176+IL1RAP+cells by the bi-specific antibody; TF1RAPa.** In line with the level of CD176 and IL1RAP expression, no obvious CDC effect was seen in normal PBMCs (A) versus CML (B) cells, whereas TF1RAPa induced the strongest dose-dependent CDC effect in CML CD176+IL1RAP+ (C) as compared to other populations (D-F). As a control for nonspecific CDC effects, a mouse anti-human IgG antibody was also used in the experiments. Each graph shows the average and SD of antibody-induced cell death from a minimum of three CML samples.


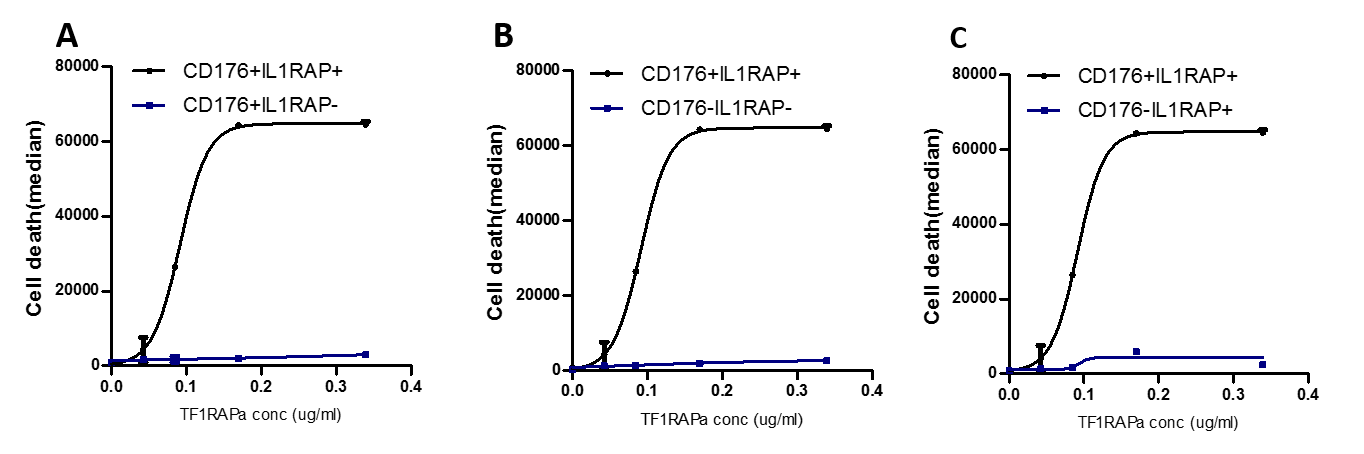


**Figure S14. Different receptors interaction with TF1RAPa, as compared to CD176+IL1RAP+.** Using Post-Hoc Bonferroni test, significant difference was observed on comparing between CD176+IL1RAP+ to CD176+IL1RAP- and CD176-IL1RAP- and not CD176-IL1RAP+.

**
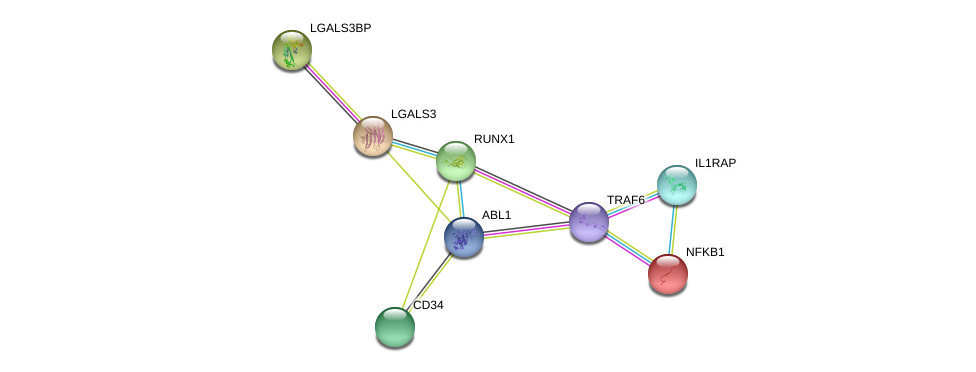
**

**Figure S15. Network connections between different molecules.**

Protein interactions as identified by String online tool where network nodes represent proteins and edges represent protein-protein associations.

Supplementary Tables

**Table S1: Sequences of primers used for mutagenesis.**

| **Primer** | **Sequence** |
| --- | --- |
| **CH1_H172A_F174G_Forward*** | 5'**gtg*gcc*acc*ggc*ccggct**gtcctacagtcctcagga3' |
| **CH1_H172A_F174G_Reverse** | 5'**agccgg*gcc*ggt*ggc*cac**gccgctggtcagggcgcctgag3' |
| **CH1_Flanking_Forward** | 5’ctggtgacgaattcgatatctcgagt3’ |
| **CH1_Flanking_Reverse** | 5’gaacttgacctcagggtcttcgtg3’ |
|  |  |
| **CH3_S354C_Forward** | 5'**ccccca*tgc*cgggaggaga**tgaccaagaaccaggtcagcc3' |
| **CH3_S354C_Reverse** | 5'**tctcctcccg*gca*tggggg**cagggtgtacacctg3' |
| **CH3_T366W_Forward** | 5'**gtcagcctg*tgg*tgcctggtcaaa**ggcttctatccca3' |
| **CH3_T366W_Reverse** | 5**'tttgaccaggca*cca*caggctgac**ctggttcttggtcat 3' |
| **CH3_Flanking_Forward** | 5'cacgaagaccctgaggtcaagttc3' |
| **CH3_Flanking_Reverse** | 5'ctgcaataaacaagttgggccatg3' |
|  |  |
| **CL_L135Y_Forward** | 5’**gtgtgtta*tat*a****agt**gacttctacccgggag3’ |
| **CL_L135Y_Reverse** | 5’**actt*ata*taacacac**cagtgtggccttgttggc3’ |
| **CL_S176W_Forward** | 5’**gcggcc*tgg*agctat**ctgagcctgacgcctgag3’ |
| **CL_S176W_Reverse** | 5’**atagct*cca*ggccgc**gtacttgttgttgct3’ |
| **CL_Flanking_Forward** | 5’tccactttgcctttctctccaca3’ |
| **CL_Flanking_Reverse** | 5’gatgagtttggacaaaccacaacta3’ |
|  |  |
| **SP6 Forward** | 5’atttaggtgacactatag3’ |

*The two mutations in the H172A_F174G were included in the same primer for their proximity

Bold text shows the sequences of the overlapping parts of the inward primers.

Underlined text denotes the mutations.

**Table S2: Lengths of generated overlapping and fusion fragments.**

| **Mutation** | **Template for PCR** | **Fragment** | **Primers** | **Expected  Length (bp)** | **Fusion Fragment Length (bp)** | **Sub-cloning restriction enzymes** |
| --- | --- | --- | --- | --- | --- | --- |
| ***CH1*** H172A F174G | **wild type, heavy chain** | **A** | **F_CH1_H172A  R_CH1_Flanking** | **327** | **500** | **BstEII, EcoRI** |
| **B** | **F-CH1_Flanking  R-CH1_CH1_H172A** | **191** |
| ***CH3-Knob*** T366W | **wild type, heavy chain** | **C** | **F_CH3_S354C  R_CH3_Flanking** | **335** | **586** | **BsrGI , Not I** |
| **D** | **F_CH3_Flanking  R_CH3_S354C** | **271** |
| ***CH3-Hole*** S354C | **wild type, heavy chain** | **E** | **F_CH3_T366W  R_CH3_Flanking** | **302** | **590** | **BsrGI ,Not I** |
| **F** | **F_CH3_Flanking  R_CH3_T366W** | **309** |
| ***CL-*** L135Y | **wild type, light chain** | **G** | **F-CL_ Flanking**  **R-CL_L135Y** | **276** | **643** | **EcoRI , Not I** |
| **H** | **F-CL_L135Y R-CL_ Flanking** | **382** |
| ***CL-*** S176W | **Mutated light chain (CL_L135Y)** | **I** | **R-CL_ S176W F-CL_ Flanking** | **396** | **643** | **EcoRI , Not I** |
| **J** | **F-CL_S176W  R-CL_ Flanking** | **262** |

**Table S3. Table showing CML patients follow up history**

| CML patient | Follow up history | IL1RAP+CD176+ (%) in CD43+ population |
| --- | --- | --- |
| CML-1 | | Dasatinib 7/2010 – 7/2011 | | --- | | Discontinued due to recurrent pleural effusion; needed pleurodesis and prednisone | | -Niolotinib initiated 7/2012 | | -Blast crisis 9/2014 | | -Deceases 9/2014 | | **51.5** |
| CML-2 | | Deceased 08/2010 | | --- | | -Took alemtuzumab three times a week for 7 weeks | | -Continued with transfusions | | -Developed thrombocytopenia | | Took G-CSF and darbepoietin | | **18.5** |
| CML-3 | | Alive | | --- | | Current therapy: Imatinib initiated May 2010; 3x weekly | | Major molecular remission: May 2012 | | Admitted for septic shock in 11/2017 | | Peripheral blood smear 11/2017 | | Off imatinib treatment for uncertain period of time due to intercurrent illness. | | **6.65** |
| CML-4 | | Alive | | --- | | -Imatinib 1/2012 to current | | -Last peripheral blood smear (3/2017) “essentially normal” | | -Still alive | | **1.35** |

Information obtained from the Gunderson Bio-Bank
